# Supplementary material for: A Novel Simian Adenovirus Associating with Human Adeno-virus Species G Isolated from Long-Tailed Macaque Feces
Source: MDPI journal article supplement (doi:10.3390/v15061371), 2023-06-14
Supplement: s1 [file s1]

**Table S1.** BLAST results of VIDISCA-based PCR products.

| <b>Virus</b>            | <b>Collection site</b> | <b>Sample ID</b> | <b>Best match by BLASTn</b> | <b>Description</b>          | <b>% query coverage</b> | <b>% nucleotide identity</b> |
|-------------------------|------------------------|------------------|-----------------------------|-----------------------------|-------------------------|------------------------------|
| Astrovirus<br>(85 bp)   | Ratchaburi             | 6-5              | BR001717.1                  | Macaque MLB-like astrovirus | 100%                    | 83.53%                       |
|                         |                        | 7-1              | BR001717.1                  | Macaque MLB-like astrovirus | 100%                    | 83.53%                       |
|                         |                        | 7-12             | BR001717.1                  | Macaque MLB-like astrovirus | 100%                    | 83.53%                       |
|                         |                        | 7-16             | BR001717.1                  | Macaque MLB-like astrovirus | 100%                    | 83.53%                       |
|                         | Prachuap Khiri Khan    | H49              | BR001717.1                  | Macaque MLB-like astrovirus | 100%                    | 83.53%                       |
|                         |                        | H51              | BR001717.1                  | Macaque MLB-like astrovirus | 100%                    | 83.53%                       |
| Enterovirus<br>(163 bp) | Ratchaburi             | 6-5              | KT961650.1                  | Simian enterovirus A92      | 99%                     | 87.65%                       |
|                         |                        | 7-3              | KT961655.1                  | Enterovirus A124            | 98%                     | 88.20%                       |
|                         |                        | 7-10             | KT961650.1                  | Simian enterovirus A92      | 99%                     | 86.42%                       |
|                         |                        | 7-15             | KT961655.1                  | Enterovirus A124            | 98%                     | 88.20%                       |
|                         |                        | 7-16             | KT961655.1                  | Enterovirus A124            | 98%                     | 88.20%                       |
|                         | Lopburi                | M1-5             | MT649088.1                  | Simian enterovirus 19       | 100%                    | 82.21%                       |
|                         |                        | M1-9             | MT649088.1                  | Simian enterovirus 19       | 100%                    | 82.82%                       |
|                         |                        | M1-13            | MT649088.1                  | Simian enterovirus 19       | 100%                    | 82.82%                       |
|                         |                        | M3-8             | OK397297.1                  | Enterovirus A               | 100%                    | 83.44%                       |
|                         |                        | M3-9             | OK397297.1                  | Enterovirus A               | 100%                    | 84.05%                       |
|                         |                        | M3-11            | OK397297.1                  | Enterovirus A               | 100%                    | 84.05%                       |
|                         |                        | M4-4             | MT649088.1                  | Simian enterovirus 19       | 100%                    | 82.21%                       |
|                         |                        | M4-5             | MT649088.1                  | Simian enterovirus 19       | 100%                    | 84.05%                       |
|                         |                        | M5-1             | MT649088.1                  | Simian enterovirus 19       | 100%                    | 82.21%                       |
|                         | Ratchaburi             | 6-3              | OQ579036.1                  | HAdV-G isolate AdV-RBR-6-3  | 100%                    | 100%                         |
|                         |                        | 6-9              | OQ579036.1                  | HAdV-G isolate AdV-RBR-6-3  | 100%                    | 100%                         |
|                         |                        | 7-5              | OQ579036.1                  | HAdV-G isolate AdV-RBR-6-3  | 100%                    | 100%                         |
|                         |                        | 7-9              | OQ579036.1                  | HAdV-G isolate AdV-RBR-6-3  | 100%                    | 100%                         |
|                         |                        | 7-14             | OQ579036.1                  | HAdV-G isolate AdV-RBR-6-3  | 100%                    | 100%                         |
| Adenovirus<br>(147 bp)  | Kanchanaburi           | 1-9              | OQ579036.1                  | HAdV-G isolate AdV-RBR-6-3  | 100%                    | 100%                         |
|                         |                        | 1-10             | OQ579036.1                  | HAdV-G isolate AdV-RBR-6-3  | 100%                    | 100%                         |
|                         | Lopburi                | M5-11            | OQ579036.1                  | HAdV-G isolate AdV-RBR-6-3  | 100%                    | 100%                         |
|                         | Prachuap Khiri Khan    | H27              | OQ579036.1                  | HAdV-G isolate AdV-RBR-6-3  | 100%                    | 100%                         |
