# Supplementary material for: A Novel Simian Adenovirus Associating with Human Adeno-virus Species G Isolated from Long-Tailed Macaque Feces
Source: MDPI journal article supplement (doi:10.3390/v15061371), 2023-06-14
Supplement: s1 [file s1]

**Table S2.** Sequences of primers used for PCR to fill gaps in AdV-RBR-6-3 whole genome.

| <b>Primer</b> | <b>Sequence 5'-3'</b>    | <b>Position on AdV-RBR-6-3<sup>a</sup></b> |
|---------------|--------------------------|--------------------------------------------|
| P1-F          | CCTTATTCTGGAAACGTGCCAA   | 17-38                                      |
| P1-R          | TAAATGGGACCTTTGAGCCTTC   | 323-344                                    |
| P2-F          | CGATGTAACCACGGACCGCTC    | 17625-17645                                |
| P2-R          | GTTGTGGGCCATGGGGAAGAAG   | 19197-19218                                |
| P3-F          | ACAAGGACAGAATGTACTCCTTCT | 19703-19726                                |
| P3-R          | AGCGGAGTTAGCGTACAGCA     | 20018-20037                                |
| P4-F          | CTACTTTGAGCTGCCGGACG     | 25933-25952                                |
| P4-R          | CTGGTAATGGCTGTRCAGACCA   | 27635-27656                                |
| P5-F          | TGGTCTGTACAGCCATTACCAG   | 27635-27656                                |
| P5-R          | CGCCCACCATCATATCCCATATG  | 28560-28582                                |
| P6-F          | CATATGGGATATGATGGTGGGCG  | 28560-28582                                |
| P6-R          | CAGAAGTTTACCGCCATGAAGG   | 31323-31344                                |
| P7-F          | CAGCCATTGCCCCGTCTTAC     | 33782-33801                                |
| P7-R          | TGATAATGAGTGGGGAGGAGC    | 34084-34104                                |

<sup>a</sup>AdV-RBR-6-3 accession no. OQ579036
