# Supplementary figures and images for: A Novel Simian Adenovirus Associating with Human Adeno-virus Species G Isolated from Long-Tailed Macaque Feces
Source: MDPI journal article supplement (doi:10.3390/v15061371), 2023-06-14

**Table S3.** Alignment of AdV-RBR-6-3 genome (Query 64407) with other adenoviruses.

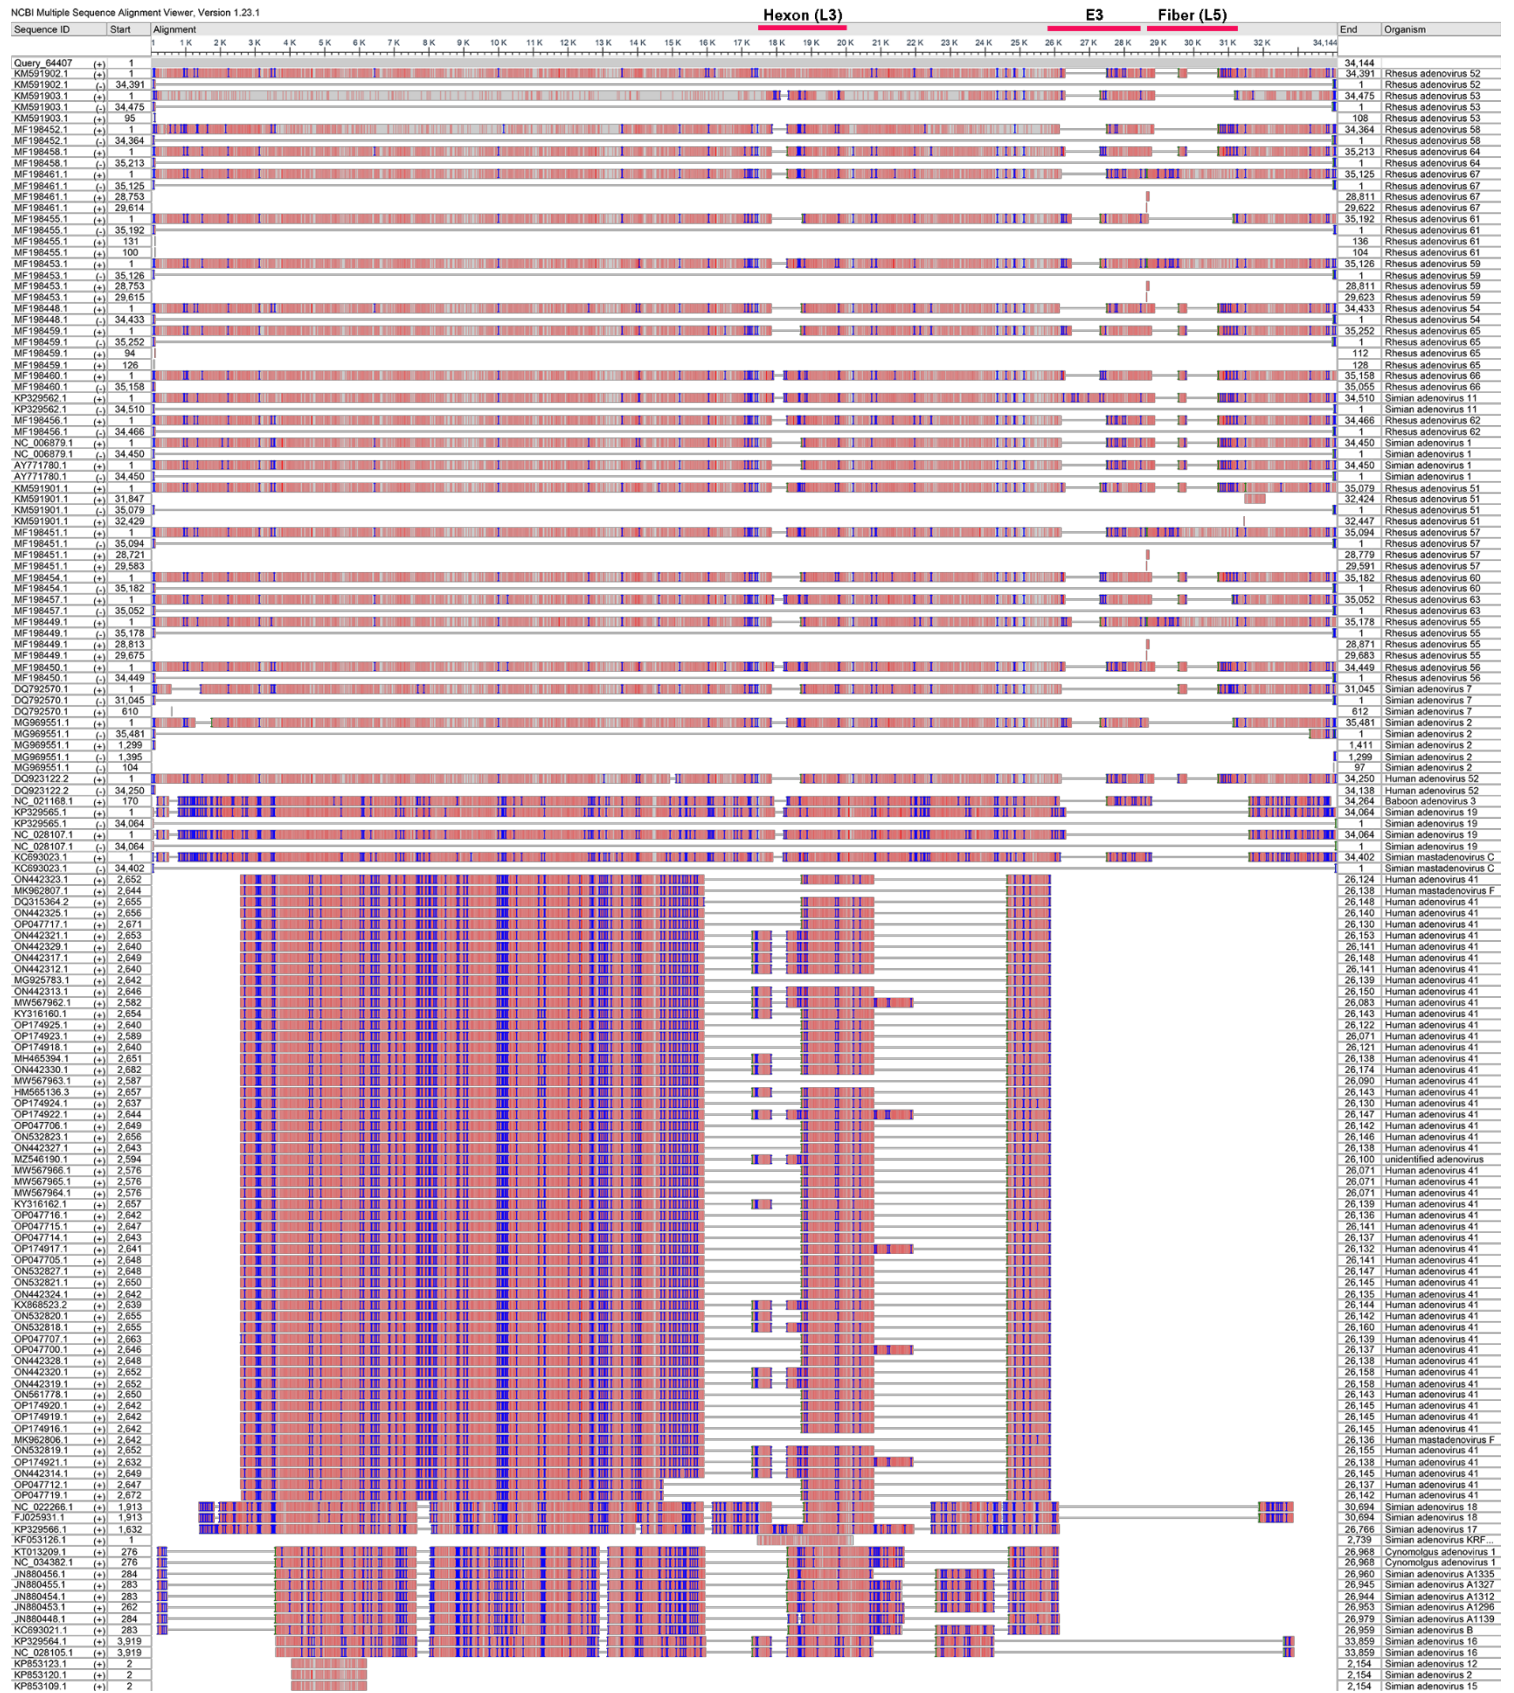

Supplement: s1 [file s1]
